1 **Variation in the microbiome of the urogenital tract of koalas**

2 **(*Phascolarctos cinereus*) with and without ‘wet bottom’**

3 **Alistair R. Legione<sup>1, \*</sup>, Jemima Amery-Gale<sup>1</sup>, Michael Lynch<sup>2</sup>, Leesa Haynes<sup>3</sup>, James R.**  
4 **Gilkerson<sup>4</sup>, Joanne M. Devlin<sup>1, #</sup> and Fiona M. Sansom<sup>1, #</sup>**

5 <sup>1</sup>Asia Pacific Centre for Animal Health, The University of Melbourne, Parkville, Victoria  
6 3052, Australia

7 <sup>2</sup>Veterinary Department, Melbourne Zoo, Parkville, Victoria 3052, Australia

8 <sup>3</sup>Faculty of Veterinary and Agricultural Sciences, The University of Melbourne, Werribee  
9 3030, Victoria, Australia

10 <sup>4</sup>Centre for Equine Infectious Diseases, The University of Melbourne, Parkville, Victoria  
11 3052, Australia

12 \* Corresponding author (email: [alegione@student.unimelb.edu.au](mailto:alegione@student.unimelb.edu.au))

13 #These authors contributed equally

14

15 **Abstract**

16 Koalas (*Phascolarctos cinereus*) are iconic Australian marsupials currently threatened by  
17 several processes. Infectious reproductive tract disease, caused by *Chlamydia pecorum*, and  
18 koala retrovirus infection are considered key drivers of population decline. The clinical sign  
19 of ‘wet bottom’, a staining of the rump associated with urinary incontinence, is often linked  
20 to chlamydial urogenital tract infections. But, wet bottom has been recorded in koalas free of  
21 *C. pecorum*, suggesting other causative agents in those individuals. Current understanding of  
22 the bacterial community of the koala urogenital tract is limited. We used 16S rRNA diversity  
23 profiling to investigate the microbiome of the urogenital tract of ten female koalas. Five  
24 presented with wet bottom and five were clinically normal. We detected thirteen phyla across  
25 the ten samples, with Firmicutes occurring at the highest relative abundance. The order  
26 Lactobacillales comprised 70.3% of the reads from all samples. After normalising reads using  
27 DESeq2 and testing for significant differences, there were 25 operational taxonomic units  
28 more commonly found in one group over the other. This study provides an essential  
29 foundation for future investigations of both the normal microflora of the koala urogenital  
30 tract, and better understanding of the causes of koala urogenital tract disease.

31

## 32 Introduction

33 The koala (*Phascolarctos cinereus*) is an iconic marsupial species endemic to Australia.  
34 Northern koala populations, in the states of Queensland and New South Wales, are currently  
35 declining due to impacts from both disease and increased urbanisation. Two significant  
36 pathogens of koalas, *Chlamydia pecorum* and koala retrovirus (KoRV), have been the focus  
37 of koala infectious disease investigation since their respective discoveries. KoRV is currently  
38 undergoing endogenisation into the genome across the koala population in Australia<sup>1</sup>. KoRV  
39 has been detected in all northern koalas sampled<sup>2</sup>, and has been associated with a large  
40 number of clinical signs of disease<sup>3</sup>. *Chlamydia pecorum* infection causes ocular and  
41 urogenital infections and can lead to blindness and infertility in koalas, greatly impacting  
42 population fecundity and survivability<sup>4,5</sup>. *C. pecorum* is commonly associated with the  
43 clinical sign known as ‘wet bottom’ or ‘dirty tail’<sup>6</sup>. This staining or scalding of the rump is  
44 associated with cystitis due to *C. pecorum* infection in some populations<sup>7</sup>, but recently  
45 samples from a large number of koalas from Victorian populations with mild wet bottom  
46 were negative via qPCR for *C. pecorum*<sup>8</sup>. In particular, koalas in a population considered at  
47 the time to be free of *C. pecorum*<sup>9</sup> had a similar prevalence and severity of wet bottom to  
48 populations where *C. pecorum* occurred in more than 35% of the population. Further analysis  
49 demonstrated that whilst wet bottom could be significantly linked to the detection of *C.*  
50 *pecorum* infection in male Victorian koalas, this relationship did not exist in females<sup>10</sup>. It may  
51 be that some other as yet unidentified organism is causing these mild clinical signs of disease  
52 in koalas, however to date there has not been extensive research to determine the normal flora  
53 of the koala urogenital tract, making it difficult to use traditional microbiological techniques  
54 to detect species of interest. Modern sequencing technology, specifically 16S rRNA  
55 biodiversity profiling, was used to improve our understanding of the microbiome of the

56 urogenital tract of koalas, and to compare the microbiome of koalas with and without mild  
57 wet bottom.

## 58 **Methods**

### 59 **Sample Collection and initial screening**

60 Samples used in this study were urogenital swabs, from female koalas, stored in RLT buffer  
61 (Qiagen) taken from an archive of koala samples collected in 2011 from French Island,  
62 Victoria, Australia (38°21'0" S, 145°22'12" E). Koala samples were collected under general  
63 anaesthetic by veterinarians and trained field assistants during routine population  
64 management exercises and clinical health of koalas was recorded at the time. Sample  
65 collection was approved by the University of Melbourne Faculty of Veterinary Science  
66 Animal Ethics Committee, application ID:1011687.1. Koala specific data collected included  
67 body condition score<sup>8</sup>, age (based on tooth wear)<sup>5</sup> and wet bottom score<sup>11</sup>. After screening all  
68 samples for *Chlamydia* spp. using a previously described qPCR<sup>12,13</sup>, we selected ten samples  
69 from female koalas where no *C. pecorum* was detected. We used five samples collected from  
70 koalas showing no clinical signs of urogenital disease and five samples collected from koalas  
71 that showed clinical signs of wet bottom (Table 1). As no blood samples were available from  
72 the koalas used in this study urogenital swabs were utilised for KoRV screening using qPCR  
73 protocols previously described<sup>14</sup>.

### 74 **Amplification and sequencing**

75 DNA extraction and amplification from the swab samples was performed commercially by  
76 The Australian Genome Research Facility (Australia). Sequencing was performed on the  
77 Illumina MiSeq platform. Variable domains three and four of bacterial 16S rRNA were  
78 amplified using primers 341F (5' CCTAYGGGRBGCASCAG 3') and 806R (5'  
79 GGACTACNNGGGTATCTAAT 3').

## 80 Quality filtering and OTU assignment

81 Quality filtering and operational taxonomic unit (OTU) assignment was undertaken using a  
82 mixture of scripts and algorithms available in the programs USEARCH<sup>15</sup> and QIIME 1.9.1  
83 (Quantitative Insights Into Microbial Ecology)<sup>16</sup>. The resulting paired-end reads for each  
84 swab sample were merged using USEARCH script **fastq\_mergepairs**. Primers were then  
85 trimmed using seqtk<sup>17</sup> and reads were filtered for quality using USEARCH script  
86 **fastq\_filter**, utilising an expected error cut off of 1, rather than PHRED quality score<sup>18</sup>.  
87 Paired reads which were shorter than 400 bp were discarded. Unique reads within the entire  
88 sample set were assigned OTUs using the USEARCH algorithms **derep\_fulllength** and  
89 **cluster\_otus**<sup>19</sup>, with a minimum identity of 97% for clustering. Singletons were excluded  
90 from analysis due to the high likelihood that they contain errors, as per USEARCH  
91 **cluster\_otus** manual<sup>20</sup>. The merged reads from each swab sample, including the previously  
92 excluded singletons were matched with the produced OTUs using USEARCH script  
93 **usearch\_global**, with a threshold of 97% identity to group a read into specific OTU. The  
94 taxonomy of each OTU was determined by using the QIIME script **assign\_taxonomy.py** in  
95 conjunction with the Greengenes taxonomy database<sup>21</sup>. Chloroplast and mitochondrial OTUs  
96 were removed from the dataset using the QIIME script **filter\_taxa\_from\_otu\_table.py**.

## 97 Read normalisation and analysis

98 Read data was assessed using three different methods. Relative abundance was utilised to  
99 compare basic phylum presence in each sample. Rarefaction of reads was undertaken, using  
100 **multiple\_rarefactions.py** QIIME script, to assess alpha and beta diversity at a set read level.  
101 Negative-binomial normalisation of reads, using DESeq2<sup>22</sup> as recommended by McMurdie  
102 and Holmes<sup>23</sup>, was performed using the QIIME script **normalize\_table.py**. Alpha-diversity  
103 metrics assessed were species richness, Chao1<sup>24</sup>, phylogenetic distance and Shannon's

104 diversity<sup>25</sup>, using reads sampled to a depth equalling the sample with the fewest reads  
105 (rounded down to the nearest 5,000 reads). Non-parametric comparisons of alpha diversity  
106 between the two sample groups (wet bottom present or absent) were undertaken with the  
107 **compare\_alpha\_diversity.py** QIIME script, with 10,000 permutations. Beta-diversity was  
108 assessed using the **beta\_diversity\_through\_plots.py** QIIME script, in which both  
109 unweighted and weighted UniFrac distances<sup>26</sup> were assessed. Bray-Curtis dissimilarity<sup>27</sup>  
110 between samples was also assessed. 3D PCoA plots were drawn within the script using  
111 EMPERor software<sup>28</sup>. Distance and dissimilarity metrics were used to compare the microbial  
112 communities between the two groups by utilising the permutational ANOVA  
113 (PERMANOVA) method within the **compare\_categories.py** QIIME script, with 10,000  
114 permutations. Statistical comparisons of the differential abundance of OTUs between koalas  
115 with and without wet bottom utilised DESeq2 within the QIIME script  
116 **differential\_abundance.py**. These comparisons aimed to determine OTUs which were over-  
117 represented in either group. Statistically significant results were based on  $P$ -values  $< 0.05$ ,  
118 and were adjusted for false discovery<sup>29</sup> within the script. The analyses listed above were  
119 repeated to compare koalas from which KoRV provirus was or was not detected.

120

## 121 **Results**

### 122 **Clinical status of koalas**

123 Of the five koalas with wet bottom, the median wet bottom clinical score was 3 (ranging from  
124 2 – 4). The five clinically healthy animals all had wet bottom clinical scores of 0. The median  
125 body condition score of all koalas included in this study was 3 (ranging from 2 – 4). The  
126 mean weight for koalas was 7.4 kg ( $\pm$  1.01 standard deviation [S.D.]) (Table 1). All koalas

127 were negative for *C. pecorum*. Three koalas were positive for KoRV provirus, two in the  
128 group of koalas without wet bottom (Table 1).

### 129 **Analysis and processing of sequencing data**

130 A total of 2,295,607 paired reads were obtained across the ten samples, with a mean read  
131 number of  $(229,560.7 \pm 40,522 \text{ S.D.})$ . The GC content of the reads was 51.8%. After quality  
132 filtering and discarding merged sequences shorter than 400, the total number of reads OTU  
133 clustering was 1,946,587, with a mean read number of 194,658.7 (S.D.  $\pm 29,951.1$ ) per  
134 sample (Table 1).

135 The filtered reads were clustered into 261 OTUs, 7 of which were either chloroplasts or  
136 mitochondria and were subsequently removed. For comparison, the same filtering and  
137 clustering methodology was run without the removal of singletons, which resulted in the  
138 clustering of reads into 592 OTUs.

### 139 **Phylum presence and relative abundance**

140 In total, 13 phyla were detected in the ten samples (Table 1), with Firmicutes occurring at the  
141 highest relative abundance (77.61%). Just over a third of the OTUs were classified as  
142 Firmicutes (95/254), followed by Proteobacteria (59/254) and the Bacteroidetes (35/254).

143 When samples were split into the two groups, koalas without wet bottom had 89.3% of reads  
144 classified as Firmicutes, followed by those which could not be assigned using the 97% cut-off  
145 (5.2%) and Actinobacteria (3.5%). Koalas with wet bottom had 68.2% Firmicutes. The next  
146 two most prevalent phyla were Proteobacteria (12.5%) and Bacteroidetes (12.2%).

147 Deferribacteres were detected in only one sample (Koala 70, wet bottom present) and  
148 Acidobacteria were only detected in two (one clinically normal koala and one displaying wet  
149 bottom). Armatimonadetes was detected in three koalas without wet bottom, but in none of

150 the five diseased koalas. These three phyla were detected at the lowest relative abundance  
151 across the ten samples.

## 152 **Richness and diversity**

153 Species richness within each sample, using absolute abundance, is described in Table 1.

154 Across the ten samples sequenced, the mean number of OTUs in each sample (with  
155 singletons, chloroplasts and mitochondria removed) was 80.0 (ranging from 55 to 126). After  
156 rarefaction to 160,000 reads, the mean OTUs of the two groups were 80.0 (S.D.  $\pm$  9.62) and  
157 75.93 (S.D.  $\pm$  24.61) for koalas with wet bottom and without wet bottom, respectively.

158 Assessing absolute reads, the median Shannon's diversity of these samples was 2.48 (ranging  
159 from 1.08 to 4.09) and the median diversity in koalas with and without wet bottom was  
160 comparable (Kruskal-Wallis test;  $H = 0.53$ , d.f. = 1,  $P = 0.465$ ). At 160,000 reads alpha  
161 diversity metrics for samples from koalas with or without wet bottom were comparable. This  
162 included OTU abundance ( $P = 0.81$ ), Chao1 ( $P = 0.83$ ), phylogenetic distance ( $P = 0.71$ ) and  
163 Shannon's diversity ( $P = 0.86$ ) (Supplementary materials S1). Results detailing  
164 presence/absence for all OTUs detected in koala urogenital samples is recorded in  
165 supplementary materials S2.

166 Fewer than half of the OTUs detected across the two sample groups were shared between  
167 them (112/254) (Figure 1). At a read depth of 160,000 there was a significant difference  
168 between the microbial communities in koalas with wet bottom compared to those without,  
169 based on the results of PERMANOVA using Bray-Curtis dissimilarity ( $F = 4.92$ ,  $P = 0.019$ )  
170 and unweighted (qualitative) UniFrac distances ( $F = 1.62$ ,  $P = 0.031$ ). There was no  
171 significant difference detected when using weighted (quantitative) UniFrac distances ( $F =$   
172  $1.51$ ,  $P = 0.061$ ). The 2D and 3D principle coordinate analysis graphs comparing koalas with  
173 and without wet bottom are shown in supplementary materials S3 and S4. There were no



174 significant differences in either alpha or beta diversity metrics when comparing koalas with  
175 or without KoRV provirus detected.

### 176 **Comparisons between samples using DESeq2 normalised reads**

177 Negative binomial normalisation of reads from each sample using DESeq2 still resulted in  
178 Firmicutes as the most dominant phylum across all samples. This was followed by  
179 Proteobacteria and Bacteroidetes (Figure 2). Overall there were 25 OTUs with significant ( $P$   
180  $< 0.05$ ) over-representation or under-representation in wet bottom affected koalas, in  
181 comparison to clinically normal koalas, based on these normalised read counts (Table 2). Of  
182 those OTUs, when assessing absolute read count, six occurred only in koalas with wet  
183 bottom, whilst eight occurred only in koalas without wet bottom (Table 2). There were no  
184 significant differences between abundances of normalised OTUs between koalas with or  
185 without KoRV provirus detected.

### 186 **Discussion**

187 Previous assessment of the koala microbiome has focused on the unique digestive system of  
188 koalas comparing either two free ranging animals from northern populations<sup>30</sup> or two captive  
189 koalas in Europe<sup>31</sup>, from which the ocular microbiome was also assessed. This study is the  
190 first investigation of the microbiome of the urogenital tract of the female koala using modern  
191 high-throughput techniques, and only the second to assess the urogenital tract of a marsupial,  
192 with the Tammar wallaby investigated previously using terminal restriction fragment length  
193 polymorphism analysis<sup>32</sup>. The majority of reads in our sample set were classified in the order  
194 Lactobacillus. This dominance of Firmicutes mirrors what has been seen in the human  
195 vaginal microbiome<sup>33</sup>. In humans, the acidic pH of the genital tract is maintained by these  
196 lactic acid producing bacteria, which in turn is thought to play a role in preventing pathogenic  
197 infection<sup>34</sup>. It appears from our sample set that koalas have a different family within the

198 *Lactobacillus*, possibly performing a similar role. The most common family within our  
199 classified OTUs, in terms of either relative or normalised read abundance, was  
200 *Aerococcaceae*, whilst in humans the *Lactobacilli* dominate the reproductive tract. Within the  
201 *Aerococcaceae*, the genera *Aerococcus* and *Facklamia* were both represented in the top four  
202 most abundant OTUs. For all four significantly differentially abundant *Aerococcus* spp.  
203 OTUs, the same OTU could be detected in at least 4/5 (80%) of the converse sample group in  
204 absolute reads. For example, OTU 4, an *Aerococcus* spp. whose representative sequence had  
205 91.8% identity to *Aerococcus urinae* occurred in all ten koala samples, but was present in  
206 significantly higher quantities in clinically normal koalas after normalisation. Whether  
207 specific *Aerococcus* spp. that are over or under-represented are an important factor in terms  
208 of disease presence requires further investigation. The production of hydrogen peroxide by  
209 commensal *Lactobacillus* is thought to play a role in reducing the successful establishment of  
210 sexually transmitted diseases in humans<sup>35,36</sup>, and it has been shown that *Aerococcus* spp. are  
211 involved in hydrogen peroxide production<sup>37,38</sup>. In humans *Aerococcus* spp. have also been  
212 associated with disease, including the aforementioned *Aerococcus urinae*, which can cause  
213 urinary tract infections<sup>39</sup> and septicaemia<sup>40</sup>. Investigations into the urinary microbiome of  
214 women with and without ‘urgency urinary incontinence’ found that *Aerococcus* spp. were  
215 detected more frequently in cases where disease was present<sup>41</sup>. In our study, the four  
216 *Aerococcus* spp. OTUs that had significantly different normalised abundance were evenly  
217 split, with two having higher abundance in koalas with wet bottom and two in koalas without  
218 wet bottom. The role of organisms within this family as opportunistic pathogens in koalas  
219 cannot be ruled out.

220 The *Aerococcus* were the most common genus amongst those OTUs with significant  
221 differential abundance after normalisation using DESeq2. The representative sequences of  
222 these four OTUs did not match known species within the *Aerococcus* genus with an identity

223 greater than 97%, suggesting that these represent novel species. This is not unexpected, as the  
224 culture of organisms from the koala urogenital tract has been limited to only a small number  
225 of studies, with the majority focused on diagnosing what was later deemed to be chlamydial  
226 infection<sup>42-44</sup>. Efforts in culturing novel bacteria from koalas have focused primarily on its  
227 unusual gut microbiome<sup>45</sup>, owing to its diet of eucalyptus leaves, as well as the microbial  
228 flora in the pouch<sup>46</sup>. Of the OTUs that were classified to species level in our study, one was  
229 classified as *Lonepinella koalarum*, which was first isolated from the faeces of a captive  
230 koala<sup>47</sup>. In our koalas, *L. koalarum* was present in 6/10 samples and occurred at a relatively  
231 low abundance in the majority, ranging from 1 to 3139 absolute reads (median of 1)  
232 (Supplementary material S2). Whilst it is possible for a species to occupy multiple body sites,  
233 it could also suggest that our samples contain minor contaminants from the intestinal tract.  
234 The anatomy of the koala, with the cloaca through which the urogenital tract is accessed also  
235 containing the rectal opening, means that such contaminants are difficult to avoid. Future  
236 studies of the urogenital tract microbiome would benefit from either taking control samples  
237 from the rectum of the koala being sampled, or inverting the cloaca so that the urogenital  
238 opening is more easily accessible, as described previously for the tammar wallaby<sup>32</sup>. In that  
239 study, approximately a quarter of phylotypes (26/96) were detected in both the urogenital and  
240 rectal samples, suggesting that bacteria occupying multiple sites in marsupials is not unusual.  
241 Whilst there did not appear to be any strong clustering on our 2D or 3D PCoA plots,  
242 comparisons of the beta-diversity between groups highlighted that the makeup of the  
243 communities was significantly different when assessing Bray-Curtis dissimilarity and  
244 unweighted UniFrac distances. These metrics assess presence/absence of OTUs between  
245 groups, with UniFrac also considering phylogenetic distance between OTUs present. The  
246 finding that weighted UniFrac distances, which considers the abundance of OTUs, were  
247 comparable between groups suggests that there was no clustering due to OTU prevalence.

248 The average number of OTUs detected in our samples is difficult to compare to other  
249 publications investigating koala microbiomes. This is both due to the impact that sample site  
250 differences would have on OTUs present, as well as the method of OTU classification used.  
251 For instance, previous research on the koala intestinal microbiome used QIIME for analysis  
252 of 454 pyrosequencing reads<sup>30</sup> and detected 1855 OTUs, after removal of chimeras and  
253 singletons, from caecum, colon, and faecal samples. Similarly, an Illumina based study of  
254 microbiomes from ocular, oral, rectal and faecal samples from two captive koalas found OTU  
255 numbers ranging between 597 to 3,592, with a median of 1,456<sup>31</sup>. The average raw read  
256 numbers per sample assessed in these projects ranged from 12,831 (454 pyrosequencing) to  
257 323,030 (Illumina). Our own average raw reads per sample were within that range (229,561),  
258 suggesting that the OTU differences between our studies are either associated with the  
259 sample site (urogenital versus digestive tract) or clustering methodology used. We employed  
260 UPARSE due to its demonstrated ability to correctly identify OTUs in a mock community  
261 and minimise spurious OTUs<sup>19</sup>.

262 It could be argued that the skewed relative abundance of Proteobacteria and Bacteroidetes in  
263 the samples from koala 49 and 70, respectively, could be a result of swab contamination with  
264 faecal material, which would impact diversity inferences. The human microbiome project  
265 identified that reads from stool samples were predominately from the Bacteroidetes phylum<sup>48</sup>,  
266 and the most recent assessment of the koala rectal microbiome found these two phyla to be  
267 the most abundant in samples taken from both koalas assessed<sup>31</sup>. The representative sequence  
268 from the OTU with the highest relative abundance from koala 49 matched *Escherichia coli*  
269 with 100% identity (429 bp) (GenBank Accession Number: KY305421). *E. coli* is an  
270 organism commonly found in the gut of mammals. It can also cause urinary tract disease  
271 through opportunistic infections in species such as humans<sup>49</sup>, cats and dogs<sup>50</sup>. It is possible  
272 that the *E. coli* detected here is responsible for a urinary tract infection, resulting in “wet

273 bottom”, rather than simply resulting from faecal contamination. Early investigations into  
274 reproductive tract disease in koalas isolated *E. coli* from the uterine horns<sup>51</sup> and from purulent  
275 exudate<sup>52</sup> of koalas suffering pyometritis. Increased sample sizes, as well as samples from  
276 different anatomical regions of the same individuals would allow elucidation of the role of *E.*  
277 *coli* as a causative agent of urogenital disease. The most abundant OTU in the sample from  
278 koala 70 had a 92.2% nucleotide identity to *Tannerella forsythia* (424 bp) (GenBank  
279 Accession Number: JN713185). This organism is more commonly considered an oral  
280 pathogen in humans, but has been isolated from women suffering from bacterial vaginosis<sup>53</sup>.  
281 An organism related to this pathogen, represented by this OTU, could also be causing wet  
282 bottom clinical signs in koalas, but more data is required to truly assess its impact.

283 The other family of significant interest are the Tissierellaceae, within the order Clostridiales.  
284 The four OTUs classified as Tissierellaceae with a significant differential abundance, three in  
285 the genus *Peptoniphilus*, all occurred in higher normalised quantities in koalas with wet  
286 bottom present. Interestingly, only one of these four OTUs was detected at all in the group of  
287 koalas without wet bottom, and only from the reads of one koala within this group. The  
288 *Peptoniphilus*, previously part of the genus *Peptostreptococcus*<sup>54</sup> within the family  
289 Peptostreptococcaceae (also in the order Clostridiales), have been associated with  
290 inflammatory diseases in other species. This includes mastitis in cattle<sup>55</sup> and pelvic  
291 inflammatory disease in humans<sup>56</sup>. Organisms in this genus are fastidious anaerobes<sup>54</sup> and  
292 therefore potentially overlooked in culture based methods of investigating urogenital tract  
293 pathogens.

294 Our sample size is larger than previous studies of koala microbiomes, which have  
295 incorporated at most two individuals, yet it is substantially smaller than many studies in  
296 human medicine which include hundreds of samples<sup>57</sup>. Our samples were opportunistically  
297 collected during population management exercises, and chosen from our sample archive due

298 to the absence of *C. pecorum* from the French Island koala population at the time of testing<sup>9</sup>.  
299 Whilst *C. pecorum* was subsequently determined to be present in this population<sup>13</sup>, no koalas  
300 used in this project were positive via a *Chlamydia* spp. PCR. Importantly, no koalas used in  
301 this study were found to have reads classified within the Chlamydiae phylum after taxonomic  
302 assignment of OTUs.

303 We have recently shown that koalas with wet bottom are almost twice as likely to be infected  
304 with KoRV<sup>58</sup>. This, in combination with the knowledge that *C. pecorum* was not associated  
305 with wet bottom in female Victorian koalas, led us to hypothesise that mild wet bottom could  
306 be associated with opportunistic urinary tract infections arising as a result of KoRV-induced  
307 immunosuppression. As no blood samples were obtained from the koalas utilised in this  
308 study, we did not have an accurate means of testing for KoRV provirus in our individuals.  
309 Previous studies have validated the use of faecal samples for KoRV testing<sup>59</sup>, but it is  
310 unlikely that urogenital swabs accurately reflect the true frequency of KoRV in our sample  
311 set, particularly as the virus has not entered the germline in Victorian koalas<sup>1</sup>. To more  
312 rigorously assess the hypothesis that KoRV might induce wet bottom in koalas through  
313 immunosuppression and opportunistic infection, a broader study using individuals of known  
314 KoRV status would be required.

315 Disturbance of the normal vaginal flora in humans, such as in cases of bacterial vaginosis, is  
316 a risk factor associated with infection by retroviruses (such as human immunodeficiency  
317 virus) and *Chlamydia trachomatis*<sup>60</sup>. Our study provides useful data as to what bacteria could  
318 be expected in a clinically normal koala's urogenital tract. This will allow for broader, more  
319 detailed studies on the impact of the koala urogenital microbiome on KoRV and *C. pecorum*  
320 infections, and vice versa. Future studies would benefit from a greater sample size and a more  
321 diverse array of sampled regions both within a single state, and across the country. It would  
322 be interesting to follow the same individuals over time to determine if mating and breeding

323 impact the microbiome of the urogenital tract, as occurs in humans<sup>61</sup>. However, animal  
324 welfare issues regarding recapturing wild koalas multiple times may make this unfeasible.  
325 Additionally, as our study focused solely on female koalas, a follow up survey of the  
326 microbiome of the male reproductive tract would be enlightening. Finally, targeted studies  
327 assessing the prevalence of organisms associated with wet bottom would increase our  
328 understanding of organisms potentially impacting koala populations and could in turn assist  
329 with conservation of this iconic species.

### 330 **Acknowledgements**

331 The authors would like to acknowledge the guidance and advice of Mr. Brendan Ansell.  
332 Alistair Legione is supported by an Australian Postgraduate Award. Funding for the research  
333 described was provided by the Holsworth Wildlife Research Endowment – Equity Trustees.

### 334 **Author Contributions**

335 ARL conceived the project, processed and analysed the data and drafted the manuscript. JAG  
336 collected samples used, collected clinical information from sampled koalas and revised the  
337 manuscript. ML refined the project and revised the manuscript. LH collected clinical  
338 information from koalas and revised the manuscript. JG refined the project and revised the  
339 manuscript. JMD conceived and refined the project and drafted the manuscript. FMS  
340 conceived and refined the project and drafted the manuscript.

### 341 **Additional Information**

342 All reads used in the project are available through the NCBI BioProject ID: PRJNA359726.  
343 The authors declare that there are no competing financial interests in relation to this research.

344



## 345 References

- 346 1 Tarlinton, R. E., Meers, J. & Young, P. R. Retroviral invasion of the koala genome.  
347 *Nature* **442**, 79-81 (2006).
- 348 2 Simmons, G. S. *et al.* Prevalence of koala retrovirus in geographically diverse  
349 populations in Australia. *Aust. Vet. J.* **90**, 404-409 (2012).
- 350 3 Hanger, J. J. & Loader, J. Disease in wild koalas (*Phascolarctos cinereus*) with  
351 possible koala retrovirus involvement. *Tech Rep Aust Mus (online)* **24**, 19-29 (2014).
- 352 4 Girjes, A. A., Hugall, A. F., Timms, P. & Lavin, M. F. Two distinct forms of  
353 *Chlamydia psittaci* associated with disease and infertility in *Phascolarctos cinereus*  
354 (koala). *Infect. Immun.* **56**, 1897-1900 (1988).
- 355 5 Martin, R. W. Age-specific fertility in three populations of the koala, *Phascolarctos*  
356 *cinereus* Goldfuss, in Victoria. *Wildl. Res.* **8**, 275-283 (1981).
- 357 6 Dickens, R. K. in *Refresher Course for Veterinarians Proceedings No. 29.* 105-117  
358 (The University of Sydney).
- 359 7 Brown, A. S., Girjes, A. A., Lavin, M. F., Timms, P. & Woolcock, J. B. Chlamydial  
360 disease in koalas. *Aust Vet J* **64**, 346 - 350 (1987).
- 361 8 Patterson, J. L. S. *et al.* The prevalence and clinical significance of *Chlamydia*  
362 infection in island and mainland populations of Victorian koalas (*Phascolarctos*  
363 *cinereus*). *J. Wildl. Dis.* **51**, 309-317 (2015).
- 364 9 Martin, R. W. & Handasyde, K. A. *The koala: natural history, conservation and*  
365 *management.* 2nd edn, (UNSW Press Ltd, 1999).
- 366 10 Legione, A. R. *et al.* Identification of unusual *Chlamydia pecorum* genotypes in  
367 Victorian koalas (*Phascolarctos cinereus*) and clinical variables associated with  
368 infection. *J. Med. Microbiol.* **65**, 420-428 (2016).
- 369 11 Griffith, J. E. *Studies into the diagnosis, treatment and management of chlamydiosis*  
370 *in koalas* Doctorate of Philosophy thesis, The University of Sydney, (2010).
- 371 12 Robertson, T. *et al.* Characterization of *Chlamydiaceae* species using PCR and high  
372 resolution melt curve analysis of the 16S rRNA gene. *J. Appl. Microbiol.* **107**, 2017-  
373 2028 (2009).
- 374 13 Legione, A. R. *et al.* *Chlamydia pecorum* infection in free-ranging koalas  
375 (*Phascolarctos cinereus*) on French Island, Victoria, Australia. *J. Wildl. Dis.* **52**  
376 (2016).
- 377 14 Tarlinton, R., Meers, J., Hanger, J. & Young, P. Real-time reverse transcriptase PCR  
378 for the endogenous koala retrovirus reveals an association between plasma viral load  
379 and neoplastic disease in koalas. *J. Gen. Virol.* **86**, 783-787 (2005).
- 380 15 Edgar, R. C. Search and clustering orders of magnitude faster than BLAST.  
381 *Bioinformatics* **26**, 2460-2461 (2010).
- 382 16 Caporaso, J. G. *et al.* QIIME allows analysis of high-throughput community  
383 sequencing data. *Nat. Meth.* **7**, 335-336 (2010).
- 384 17 Li, H. <https://github.com/lh3/seqtk>, (2012).
- 385 18 Edgar, R. C. & Flyvbjerg, H. Error filtering, pair assembly and error correction for  
386 next-generation sequencing reads. *Bioinformatics* **31**, 3476-3482 (2015).
- 387 19 Edgar, R. C. UPARSE: highly accurate OTU sequences from microbial amplicon  
388 reads. *Nat. Meth.* **10**, 996-998 (2013).
- 389 20 Edgar, R. C. <http://www.drive5.com/usearch/manual/>, (2016).
- 390 21 DeSantis, T. Z. *et al.* Greengenes, a Chimera-Checked 16S rRNA Gene Database and  
391 Workbench Compatible with ARB. *Appl. Environ. Microbiol.* **72**, 5069-5072 (2006).
- 392 22 Love, M. I., Huber, W. & Anders, S. Moderated estimation of fold change and  
393 dispersion for RNA-seq data with DESeq2. *Genome Biol* **15**, 550 (2014).



- 394 23 McMurdie, P. J. & Holmes, S. Waste not, want not: why rarefying microbiome data is  
395 inadmissible. *PLoS Comput. Biol.* **10**, e1003531 (2014).
- 396 24 Chao, A. Nonparametric Estimation of the Number of Classes in a Population.  
397 *Scandinavian Journal of Statistics* **11**, 265-270 (1984).
- 398 25 Shannon, C. E. A mathematical theory of communication. *The Bell System Technical*  
399 *Journal* **27**, 379-423 (1948).
- 400 26 Lozupone, C. & Knight, R. UniFrac: a New Phylogenetic Method for Comparing  
401 Microbial Communities. *Appl. Environ. Microbiol.* **71**, 8228-8235 (2005).
- 402 27 Bray, J. R. & Curtis, J. T. An ordination of the upland forest communities of southern  
403 Wisconsin. *Ecol. Monogr.* **27**, 325-349 (1957).
- 404 28 Vázquez-Baeza, Y., Pirrung, M., Gonzalez, A. & Knight, R. EMPeror: a tool for  
405 visualizing high-throughput microbial community data. *GigaScience* **2**, 16-16 (2013).
- 406 29 Benjamini, Y. & Hochberg, Y. Controlling the False Discovery Rate: A Practical and  
407 Powerful Approach to Multiple Testing. *Journal of the Royal Statistical Society.*  
408 *Series B (Methodological)* **57**, 289-300 (1995).
- 409 30 Barker, C. J., Gillett, A., Polkinghorne, A. & Timms, P. Investigation of the koala  
410 (*Phascolarctos cinereus*) hindgut microbiome via 16S pyrosequencing. *Vet.*  
411 *Microbiol.* **167**, 554-564 (2013).
- 412 31 Alfano, N. *et al.* Variation in koala microbiomes within and between individuals:  
413 effect of body region and captivity status. *Sci. Rep.* **5** (2015).
- 414 32 Chhour, K.-L., Hinds, L. A., Deane, E. M. & Jacques, N. A. The microbiome of the  
415 cloacal openings of the urogenital and anal tracts of the tammar wallaby, *Macropus*  
416 *eugenii*. *Microbiology* **154**, 1535-1543 (2008).
- 417 33 Zhou, X. *et al.* Differences in the composition of vaginal microbial communities  
418 found in healthy caucasian and black women. *ISME J.* **1**, 121-133 (2007).
- 419 34 Boskey, E. R., Telsch, K. M., Whaley, K. J., Moench, T. R. & Cone, R. A. Acid  
420 Production by Vaginal Flora In Vitro Is Consistent with the Rate and Extent of  
421 Vaginal Acidification. *Infect. Immun.* **67**, 5170-5175 (1999).
- 422 35 Klebanoff, S. J. & Coombs, R. W. Viricidal effect of *Lactobacillus acidophilus* on  
423 human immunodeficiency virus type 1: possible role in heterosexual transmission.  
424 *The Journal of Experimental Medicine* **174**, 289-292 (1991).
- 425 36 Martin, H. L. *et al.* Vaginal Lactobacilli, Microbial Flora, and Risk of Human  
426 Immunodeficiency Virus Type 1 and Sexually Transmitted Disease Acquisition. *J.*  
427 *Infect. Dis.* **180**, 1863-1868 (1999).
- 428 37 Streitenberger, S. A., Lopez-Mas, J. A., Sanchez-Ferrer, A. & Garcia-Carmona, F.  
429 Highly efficient *Aerococcus viridans* L-alpha-glycerophosphate oxidase production in  
430 the presence of H<sub>2</sub>O<sub>2</sub>-decomposing agent: purification and kinetic characterization.  
431 *Applied Microbiology Biotechnology* **57**, 329-333 (2001).
- 432 38 Kontchou, C. Y. & Blondeau, R. Isolation and characterization of hydrogen peroxide  
433 producing *Aerococcus* sp. from soil samples. *FEMS Microbiol. Lett.* **68**, 323-327  
434 (1990).
- 435 39 Zhang, Q., Kwoh, C., Attorri, S. & Clarridge, J. E. *Aerococcus urinae* in Urinary  
436 Tract Infections. *J. Clin. Microbiol.* **38**, 1703-1705 (2000).
- 437 40 de Jong, M. F. C., Soetekouw, R., ten Kate, R. W. & Veenendaal, D. *Aerococcus*  
438 *urinae*: Severe and Fatal Bloodstream Infections and Endocarditis. *J. Clin. Microbiol.*  
439 **48**, 3445-3447 (2010).
- 440 41 Pearce, M. M. *et al.* The female urinary microbiome: a comparison of women with  
441 and without urgency urinary incontinence. *mBio* **5** (2014).
- 442 42 Obendorf, D. L. Causes of mortality and morbidity of wild koalas, *Phascolarctos*  
443 *cinereus* (Goldfuss), in Victoria, Australia. *J. Wildl. Dis.* **19**, 123-131 (1983).

- 444 43 Brown, A. S. & Grice, R. G. Isolation of *Chlamydia psittaci* from koalas  
445 (*Phascolarctos cinereus*). *Aust. Vet. J.* **61**, 413 (1984).
- 446 44 McKenzie, R. A. Observations on diseases of free-living and captive koalas  
447 (*Phascolarctos cinereus*). *Aust. Vet. J.* **57**, 243-246 (1981).
- 448 45 Osawa, R., Blanshard, W. & Ocallaghan, P. Microbiological Studies of the Intestinal  
449 Microflora of the Koala, *Phascolarctos-Cinereus* .2. Pap, a Special Maternal Feces  
450 Consumed by Juvenile Koalas. *Aust. J. Zool.* **41**, 611-620 (1993).
- 451 46 Osawa, R., Blanshard, W. H. & O'Callaghan, P. G. Microflora of the Pouch of the  
452 Koala (*Phascolarctos cinereus*). *J. Wildl. Dis.* **28**, 276-280 (1992).
- 453 47 Osawa, R. *et al.* *Lonepinella koalarum* gen. nov., sp. nov., a new tannin-protein  
454 complex degrading bacterium. *Syst. Appl. Microbiol.* **18**, 368-373 (1995).
- 455 48 Human Microbiome Project Consortium. Structure, function and diversity of the  
456 healthy human microbiome. *Nature* **486**, 207-214 (2012).
- 457 49 Johnson, J. R. Virulence factors in *Escherichia coli* urinary tract infection. *Clin.*  
458 *Microbiol. Rev.* **4**, 80-128 (1991).
- 459 50 Wooley, R. E. & Blue, J. L. Quantitative and bacteriological studies of urine  
460 specimens from canine and feline urinary tract infections. *J. Clin. Microbiol.* **4**, 326-  
461 329 (1976).
- 462 51 Obendorf, D. L. Pathology of the female reproductive tract in the koala,  
463 *Phascolarctos cinereus* (Goldfuss), from Victoria, Australia. *J. Wildl. Dis.* **17**, 587-  
464 592 (1981).
- 465 52 Canfield, P. J., Oxenford, C. J., Love, D. N. & Dickens, R. K. Pyometra and  
466 pyovagina in koalas. *Aust. Vet. J.* **60**, 337-338 (1983).
- 467 53 Cassini, M. A. *et al.* Periodontal Bacteria in the Genital Tract: Are They Related to  
468 Adverse Pregnancy Outcome? *Int. J. Immunopathol. Pharmacol.* **26**, 931-939 (2013).
- 469 54 Ezaki, T. *et al.* Proposal of the genera *Anaerococcus* gen. nov., *Peptoniphilus* gen.  
470 nov. and *Gallicola* gen. nov. for members of the genus *Peptostreptococcus*. *Int J Syst*  
471 *Evol Microbiol* **51**, 1521-1528 (2001).
- 472 55 Madsen, M., Sørensen, G. H. & Aalbaek, B. Summer mastitis in heifers: a  
473 bacteriological examination of secretions from clinical cases of summer mastitis in  
474 Denmark. *Vet. Microbiol.* **22**, 319-328 (1990).
- 475 56 Cunningham, F. G., Hauth, J. C., Gilstrap, L. C., Herbert, W. N. & Kappus, S. S. The  
476 bacterial pathogenesis of acute pelvic inflammatory disease. *Obstet. Gynecol.* **52**, 161-  
477 164 (1978).
- 478 57 Ravel, J. *et al.* Vaginal microbiome of reproductive-age women. *Proceedings of the*  
479 *National Academy of Sciences* **108**, 4680-4687 (2011).
- 480 58 Leone, A. R. *et al.* Koala retrovirus (KoRV) genotyping analyses reveal a low  
481 prevalence of KoRV-A in Victorian koalas and an association with clinical disease. *J*  
482 *Med Microbiol* (2016).
- 483 59 Wedrowicz, F., Saxton, T., Mosse, J., Wright, W. & Hogan, F. E. A non-invasive tool  
484 for assessing pathogen prevalence in koala (*Phascolarctos cinereus*) populations:  
485 detection of *Chlamydia pecorum* and koala retrovirus (KoRV) DNA in genetic  
486 material sourced from scats. *Conservation Genet Resour.* 1-11 (2016).
- 487 60 Wiesenfeld, H. C., Hillier, S. L., Krohn, M. A., Landers, D. V. & Sweet, R. L.  
488 Bacterial Vaginosis Is a Strong Predictor of *Neisseria gonorrhoeae* and *Chlamydia*  
489 *trachomatis* Infection. *Clin. Infect. Dis.* **36**, 663-668 (2003).
- 490 61 Aagaard, K. *et al.* A Metagenomic Approach to Characterization of the Vaginal  
491 Microbiome Signature in Pregnancy. *PLoS ONE* **7**, e36466 (2012).
- 492 62 Zhang, Z., Schwartz, S., Wagner, L. & Miller, W. A Greedy Algorithm for Aligning  
493 DNA Sequences. *J. Comput. Biol.* **7**, 203-214 (2000).

494

495

**Table 1.** Koala metrics and relative abundance data from ten samples submitted for 16S rRNA amplicon sequencing. All koalas were female and sampled from French Island, Victoria, Australia in 2011.

| Koala/Sample name                 | K1      | K2      | K3      | K4     | K5      | K31     | K49    | K55     | K59     | K70     |
|-----------------------------------|---------|---------|---------|--------|---------|---------|--------|---------|---------|---------|
| Weight (kg)                       | 6.0     | 7.4     | 6.4     | 7.0    | 8.0     | 7.9     | 7.8    | 7.3     | 7.1     | 9.7     |
| Wet bottom score*                 | 0       | 0       | 0       | 0      | 0       | 2       | 3      | 3       | 4       | 3       |
| Body condition score <sup>^</sup> | 4       | 4       | 3       | 4      | 3       | 3       | 4      | 3       | 2       | 3       |
| Tooth wear class <sup>+</sup>     | II      | IVa     | III     | I      | IVb     | III     | III    | IVa     | IVc     | IVb     |
| KoRV detected                     | No      | Yes     | Yes     | No     | No      | No      | No     | Yes     | No      | No      |
| Total reads used                  | 225868  | 178678  | 169576  | 203062 | 166906  | 162343  | 177452 | 216270  | 192105  | 254327  |
| Total OTUs                        | 93      | 66      | 86      | 89     | 74      | 55      | 61     | 74      | 76      | 126     |
| <b>Phyla<sup>#</sup></b>          |         |         |         |        |         |         |        |         |         |         |
| Acidobacteria                     | -       | -       | -       | -      | < 0.01% | -       | -      | -       | -       | 0.01%   |
| Actinobacteria                    | 5.47%   | 9.06%   | 2.92%   | 0.17%  | 0.03%   | 3.27%   | 0.66%  | 1.50%   | 0.30%   | 0.19%   |
| Armatimonadetes                   | < 0.01% | < 0.01% | -       | -      | < 0.01% | -       | -      | -       | -       | -       |
| Bacteroidetes                     | 0.57%   | 0.05%   | 2.14%   | 1.72%  | 0.21%   | 0.33%   | 0.05%  | 9.05%   | 1.00%   | 50.53%  |
| Cyanobacteria                     | < 0.01% | -       | < 0.01% | -      | -       | -       | -      | -       | -       | 0.02%   |
| Deferribacteres                   | -       | -       | -       | -      | -       | -       | -      | -       | -       | < 0.01% |
| Firmicutes                        | 92.92%  | 89.57%  | 85.67%  | 79.17% | 98.92%  | 80.35%  | 40.92% | 84.88%  | 95.65%  | 39.09%  |
| Fusobacteria                      | 0.02%   | < 0.01% | < 0.01% | 0.07%  | < 0.01% | < 0.01% | -      | < 0.01% | 0.02%   | 1.09%   |
| Planctomycetes                    | -       | -       | < 0.01% | -      | 0.01%   | -       | -      | -       | < 0.01% | 0.80%   |
| Proteobacteria                    | 0.24%   | 0.15%   | 1.66%   | 1.51%  | 0.45%   | 0.23%   | 56.90% | 0.19%   | 2.37%   | 2.70%   |
| Synergistetes                     | 0.08%   | 0.02%   | 0.30%   | 0.31%  | 0.01%   | -       | -      | < 0.01% | 0.02%   | 4.35%   |
| TM7                               | 0.02%   | 0.50%   | 0.21%   | -      | < 0.01% | 1.38%   | 0.05%  | 2.86%   | < 0.01% | 0.02%   |
| Verrucomicrobia                   | < 0.01% | < 0.01% | < 0.01% | -      | 0.02%   | < 0.01% | -      | -       | 0.01%   | 0.69%   |
| Unassigned                        | 0.69%   | 0.65%   | 7.07%   | 17.04% | 0.34%   | 14.44%  | 1.42%  | 1.52%   | 0.61%   | 0.52%   |

\* Wet bottom score ranges from 0 (absent) to 10 (most severe)<sup>11</sup>

<sup>^</sup> Body condition score ranges from 1 (low/poor condition) to 5 (high/over conditioned). A score of 3 is considered standard<sup>8</sup>

<sup>+</sup> Tooth wear class can be used to estimate koala age and ranges from I (young) to VIII (old)<sup>5</sup>

<sup>#</sup> Phyla assigned using QIIME<sup>16</sup> script **assign\_taxonomy.py** utilising Greengenes<sup>21</sup> curated 16S rRNA library

**Table 2.** Significant operational taxonomic units (OTU) assessed using DESeq2<sup>22</sup>, ordered from lowest to highest adjusted *P* value. Representative sequences were compared to NCBI nucleotide database using MegaBLAST<sup>62</sup>, excluding ‘uncultured organisms’

| OTU ID | Adjusted <i>P</i> value | Higher abundance group* | OTU present in samples/n |            | NCBI Mega BLAST ^                     | Nucleotide Identity (%)^ | Accession number^ |
|--------|-------------------------|-------------------------|--------------------------|------------|---------------------------------------|--------------------------|-------------------|
|        |                         |                         | WB absent                | WB present |                                       |                          |                   |
| 38     | < 0.001                 | WB present              | 0/5                      | 5/5        | <i>Peptoniphilus indolicus</i>        | 96.8                     | NR_117566         |
| 21     | < 0.001                 | WB present              | 1/5                      | 5/5        | <i>Peptoniphilus asaccharolyticus</i> | 100                      | KP944181          |
| 47     | < 0.001                 | WB present              | 0/5                      | 3/5        | <i>Levyella massiliensis</i>          | 100                      | NR_133039         |
| 51     | < 0.001                 | WB present              | 0/5                      | 3/5        | <i>Peptoniphilus lacrimalis</i>       | 100                      | KM624632          |
| 65     | 0.001                   | WB present              | 1/5                      | 2/5        | <i>Sutterellaceae bacterium</i>       | 99.5                     | LK054638          |
| 86     | 0.003                   | WB absent               | 3/5                      | 0/5        | <i>Bacteroides thetaiotaomicron</i>   | 100                      | KU234409          |
| 75     | 0.004                   | WB absent               | 2/5                      | 0/5        | <i>Clostridium</i> sp.                | 96.5                     | AB622820          |
| 4      | 0.004                   | WB absent               | 5/5                      | 5/5        | <i>Lactobacillales bacterium</i>      | 92.8                     | HQ115584          |
| 70     | 0.005                   | WB absent               | 2/5                      | 0/5        | <i>Clostridium neopropionicum</i>     | 94.6                     | JQ897394          |
| 73     | 0.005                   | WB present              | 0/5                      | 2/5        | <i>Alistipes onderdonkii</i>          | 93.6                     | NR_113151         |
| 69     | 0.005                   | WB absent               | 2/5                      | 0/5        | <i>Lachnospiraceae bacterium</i>      | 95.3                     | EU728729          |
| 2      | 0.006                   | WB absent               | 5/5                      | 5/5        | <i>Trichococcus</i> sp.               | 94.2                     | KU533824          |
| 94     | 0.007                   | WB absent               | 2/5                      | 1/5        | <i>Rhizobiales</i> sp.                | 100                      | KJ016001          |
| 95     | 0.013                   | WB absent               | 2/5                      | 0/5        | <i>Rhizobium leguminosarum</i>        | 100                      | KX346599          |
| 103    | 0.019                   | WB absent               | 2/5                      | 0/5        | <i>Piscinibacter aquaticus</i>        | 88.6                     | NR_114061         |
| 106    | 0.019                   | WB absent               | 3/5                      | 0/5        | <i>Burkholderia cenocepacia</i>       | 100                      | KU749979          |
| 109    | 0.019                   | WB present              | 0/5                      | 2/5        | <i>Peptostreptococcus anaerobius</i>  | 94.1                     | NR_042847         |
| 148    | 0.019                   | WB present              | 0/5                      | 2/5        | <i>Trichococcus</i> sp.               | 87.5                     | KU533824          |
| 159    | 0.019                   | WB present              | 2/5                      | 4/5        | <i>Abiotrophia defectiva</i>          | 87.9                     | JF803600          |
| 114    | 0.019                   | WB absent               | 2/5                      | 1/5        | <i>Massilia</i> sp.                   | 99.8                     | JF279920          |
| 113    | 0.019                   | WB absent               | 3/5                      | 0/5        | <i>Agrobacterium tumefaciens</i>      | 100                      | KU955329          |
| 1      | 0.030                   | WB present              | 5/5                      | 5/5        | <i>Aerococcus viridans</i>            | 95.1                     | KC699123          |
| 105    | 0.035                   | WB present              | 4/5                      | 5/5        | <i>Aerococcus sanguinicola</i>        | 93.0                     | LC145565          |
| 250    | 0.038                   | WB present              | 1/5                      | 2/5        | <i>Hippea</i> sp.                     | 79.5                     | FR754504          |

|    |       |            |     |     |                               |      |           |
|----|-------|------------|-----|-----|-------------------------------|------|-----------|
| 90 | 0.038 | WB present | 1/5 | 2/5 | <i>Olsenella scatoligenes</i> | 97.8 | NR_134781 |
|----|-------|------------|-----|-----|-------------------------------|------|-----------|

\* OTU was detected with significantly higher normalised read counts in koalas with (WB present) or without (WB absent) wet bottom

^ Organism with the lowest e-value detected using a MegaBLAST search of the NCBI nucleotide database, the nucleotide identity compared to the representative sequence, and the accession number of the hit

**Supplementary Material 1.** Alpha diversity metrics for microbial communities in the urogenital tract of koalas with and without wet bottom. All metrics assessed at a depth of 160,000 reads, with 100 permutations. *P* values comparing categories are non-parametric t-tests using 10,000 Monte Carlo permutations.

|                      | Wet bottom absent |         |         |         |         |                     | Wet bottom present |          |          |          |          |                      | <i>P</i> value |
|----------------------|-------------------|---------|---------|---------|---------|---------------------|--------------------|----------|----------|----------|----------|----------------------|----------------|
|                      | Koala 1           | Koala 2 | Koala 3 | Koala 4 | Koala 5 | Mean ( $\pm$ SD)    | Koala 31           | Koala 49 | Koala 55 | Koala 59 | Koala 70 | Mean ( $\pm$ SD)     |                |
| <b>Shannon</b>       | 2.58              | 2.74    | 2.97    | 3.08    | 1.08    | 2.49 ( $\pm$ 0.73)  | 2.37               | 1.44     | 2.30     | 1.81     | 4.09     | 2.40 ( $\pm$ 0.91)   | 0.86           |
| <b>Chao1</b>         | 97.09             | 84.91   | 91.46   | 92.46   | 87.57   | 90.70 ( $\pm$ 4.19) | 58.69              | 76.39    | 91.54    | 87.42    | 127.94   | 88.39 ( $\pm$ 22.81) | 0.83           |
| <b>Richness</b>      | 88.77             | 64.11   | 85.40   | 88.03   | 73.70   | 80.00 ( $\pm$ 9.62) | 54.91              | 59.24    | 69.23    | 72.87    | 123.39   | 75.93 ( $\pm$ 24.61) | 0.81           |
| <b>PD whole tree</b> | 9.13              | 7.03    | 8.91    | 7.70    | 7.93    | 8.14 ( $\pm$ 0.78)  | 6.48               | 6.52     | 7.81     | 7.83     | 10.44    | 7.98 ( $\pm$ 1.44)   | 0.71           |

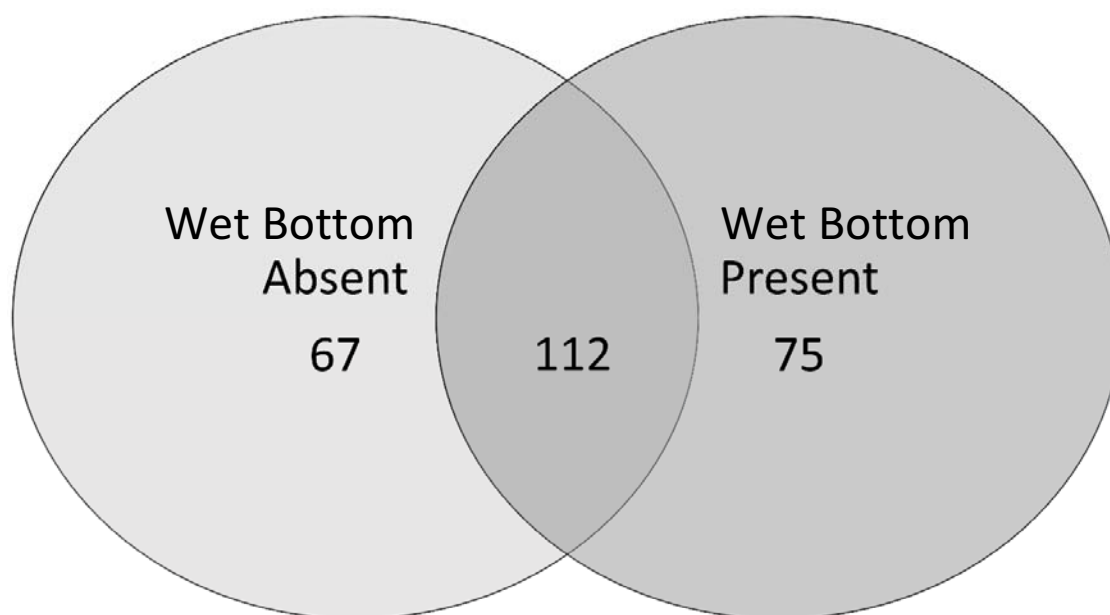

**Figure 1.** Venn diagram of the total operational taxonomic units (OTUs) detected in koalas with or without wet bottom. Overlap does not scale with OTU number.



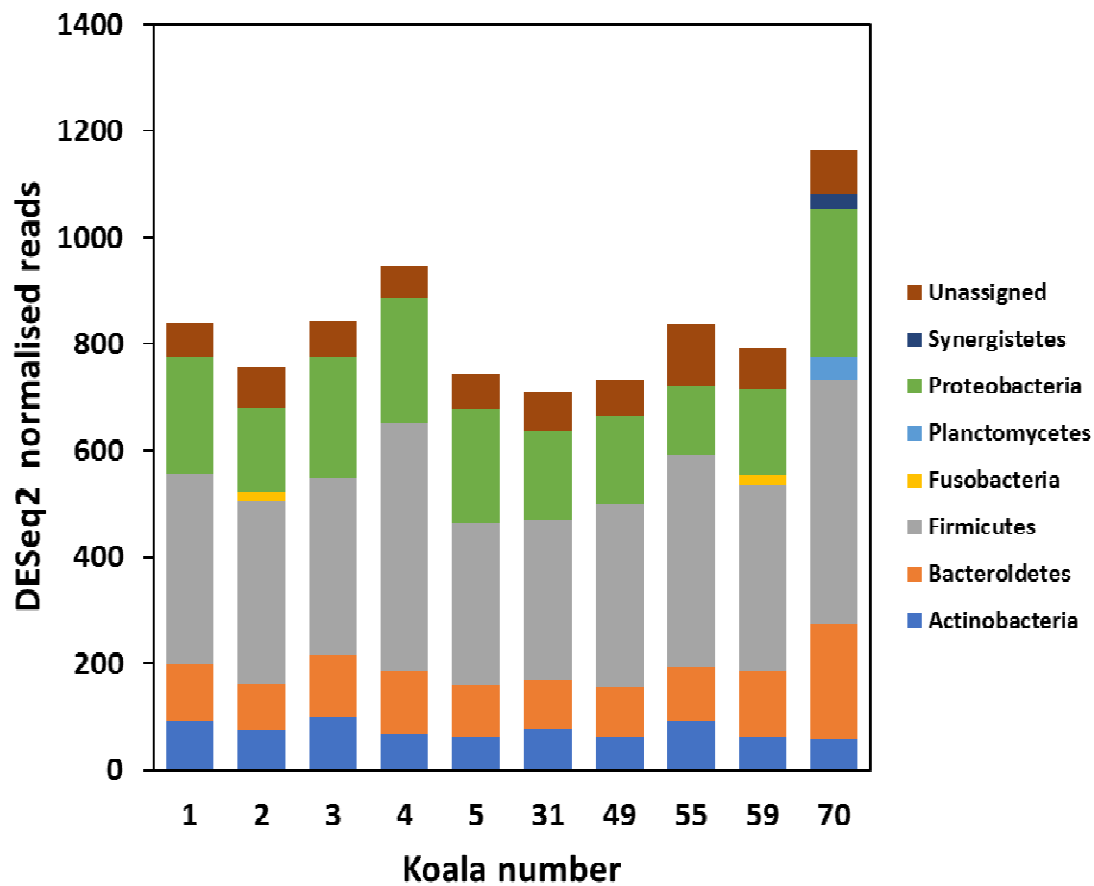

**Figure 2.** DESeq2 normalised read counts of phyla detected in koala urogenital swab samples. Reads were characterised into taxonomic groups using QIIME<sup>16</sup>, utilising Greengenes<sup>21</sup> as a reference database.

**Supplementary Material 3.** 2D PCoA plots of koala samples, with and without wet bottom, using a) unweighted UniFrac distances of rarefracted reads, b) weighted UniFrac distances of rarefracted reads, c) jackknifed unweighted UniFrac distances to 160,000 reads, d) jackknifed weighted UniFrac distances to 160,000 reads, e) weighted UniFrac distances of normalised reads

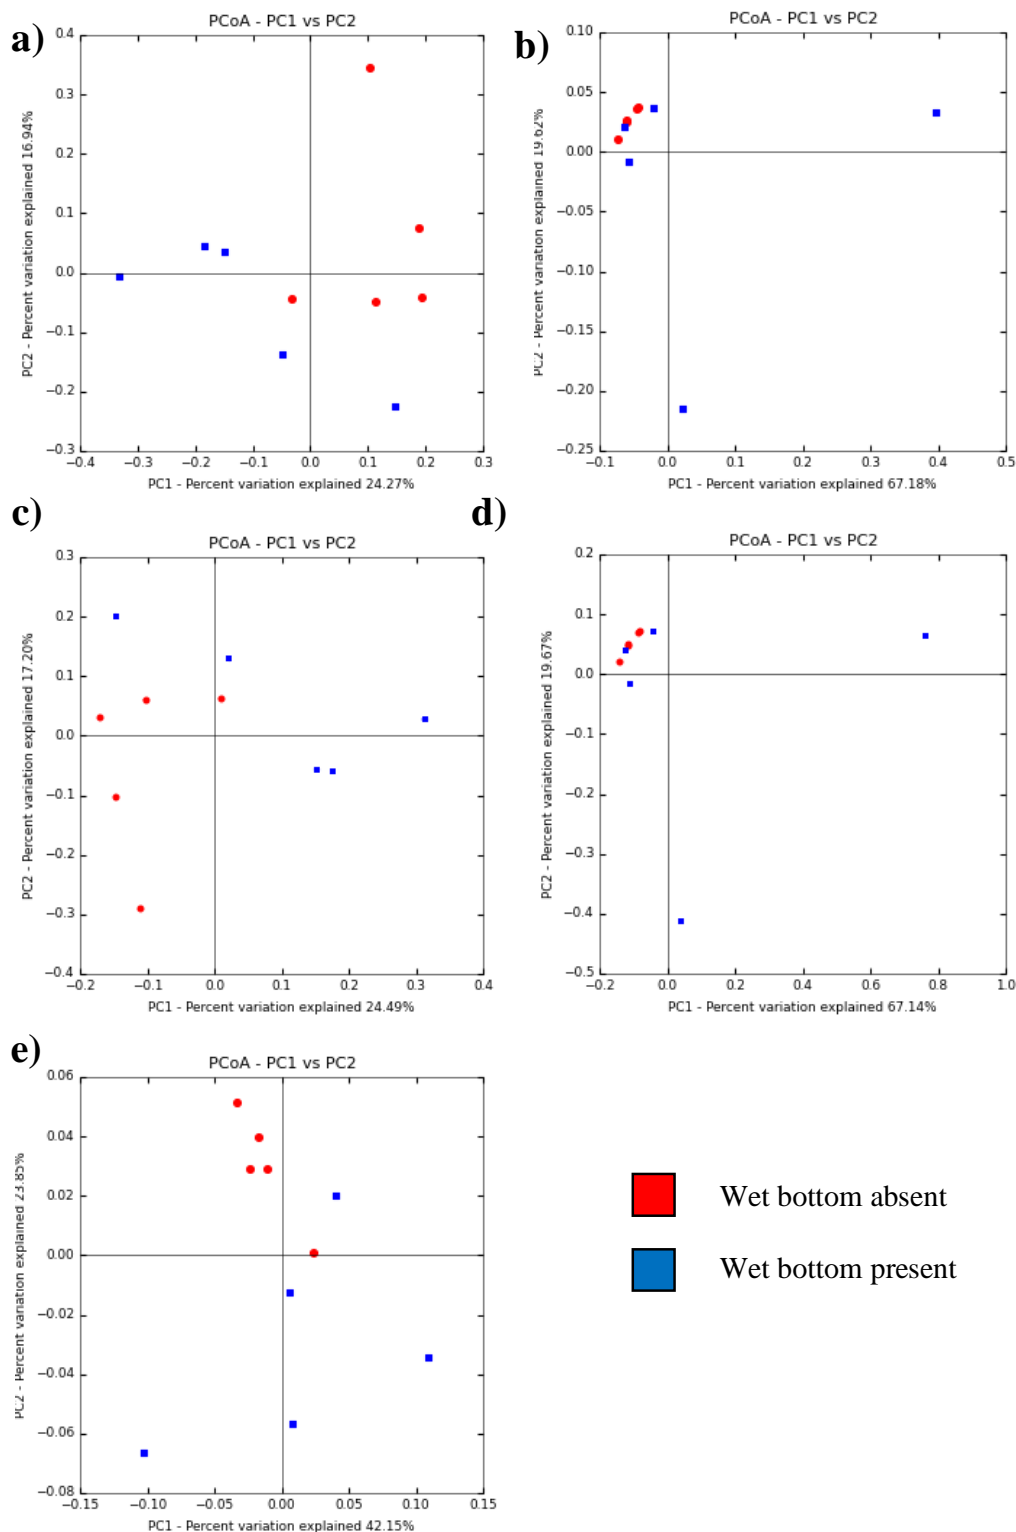

**Supplementary Material 4.** 3D PCoA plots of koala samples, with and without wet bottom, using a) unweighted UniFrac distances of rarefracted reads, b) weighted UniFrac distances of rarefracted reads, c) jackknifed unweighted UniFrac distances to 160,000 reads, d) jackknifed weighted UniFrac distances to 160,000 reads, e) weighted UniFrac distances of normalised reads

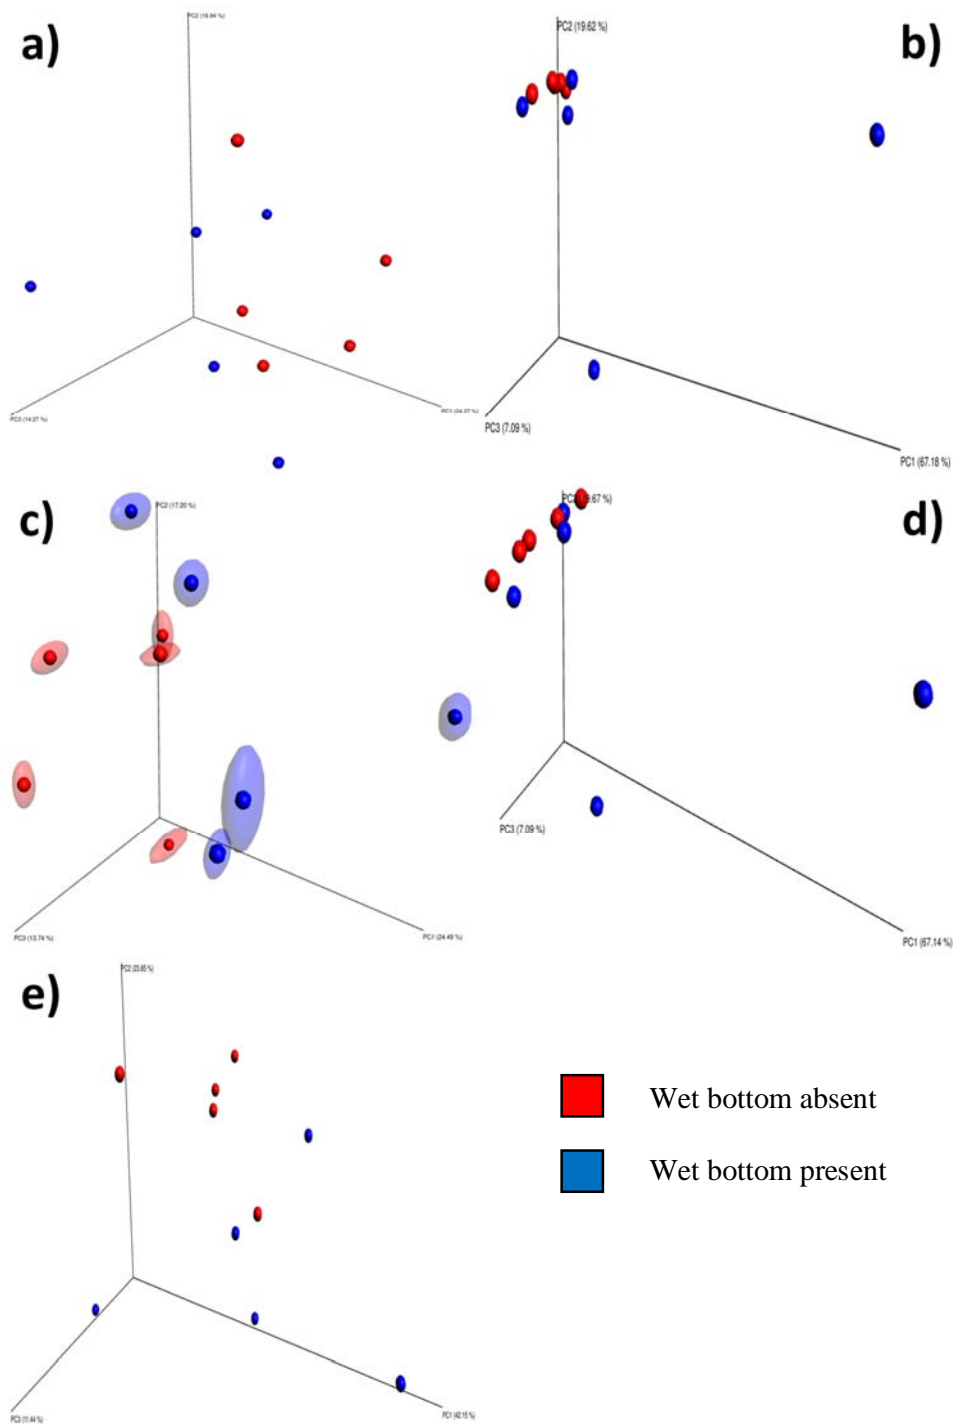

Source: http://biorxiv.org/content/10.1101/099945v1.full.pdf
